# Supplementary material for: Human T lymphotropic virus type 1 (HTLV-1) proviral load induces activation of T-lymphocytes in asymptomatic carriers
Source: PubMed Central journal article supplement (PMC4148537; doi:10.1186/1471-2334-14-453), 2014-08-22

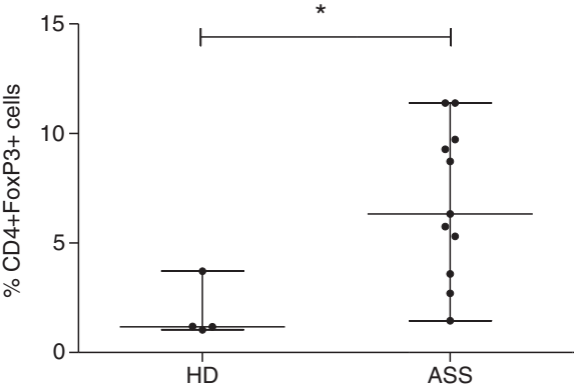

Supplement: 12879_2014_3747_MOESM3_ESM.pdf [file 12879_2014_3747_MOESM3_ESM.pdf]
